# Supplementary material for: Mineral dust and pedogenesis in the alpine critical zone
Source: Copernicus journal article supplement (doi:10.5194/soil-10-167-2024), 2024-02-22
Supplement: Supplementary file 1 [file soil-10-167-2024-supplement.zip]

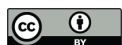

## *Supplement of*

# **Mineral dust and pedogenesis in the alpine critical zone**

**Jeffrey S. Munroe et al.**

*Correspondence to:* Jeffrey S. Munroe ([jmunroe@middlebury.edu](mailto:jmunroe@middlebury.edu))

- [soil-10-167-2024-supplement-title-page.pdf](#)
- [Figure S1.pdf](#)
- [Figure S2.pdf](#)
- [Table S1. Dust Geochem.xlsx](#)
- [Table S2. Soil Geochem.xlsx](#)
- [Table S3. Rock Geochem.xlsx](#)

The copyright of individual parts of the supplement might differ from the article licence.
