# Supplementary material for: Mineral dust and pedogenesis in the alpine critical zone
Source: Copernicus journal article supplement (doi:10.5194/soil-10-167-2024), 2024-02-22
Supplement: Supplementary file 2 [file soil-10-167-2024-supplement.zip]

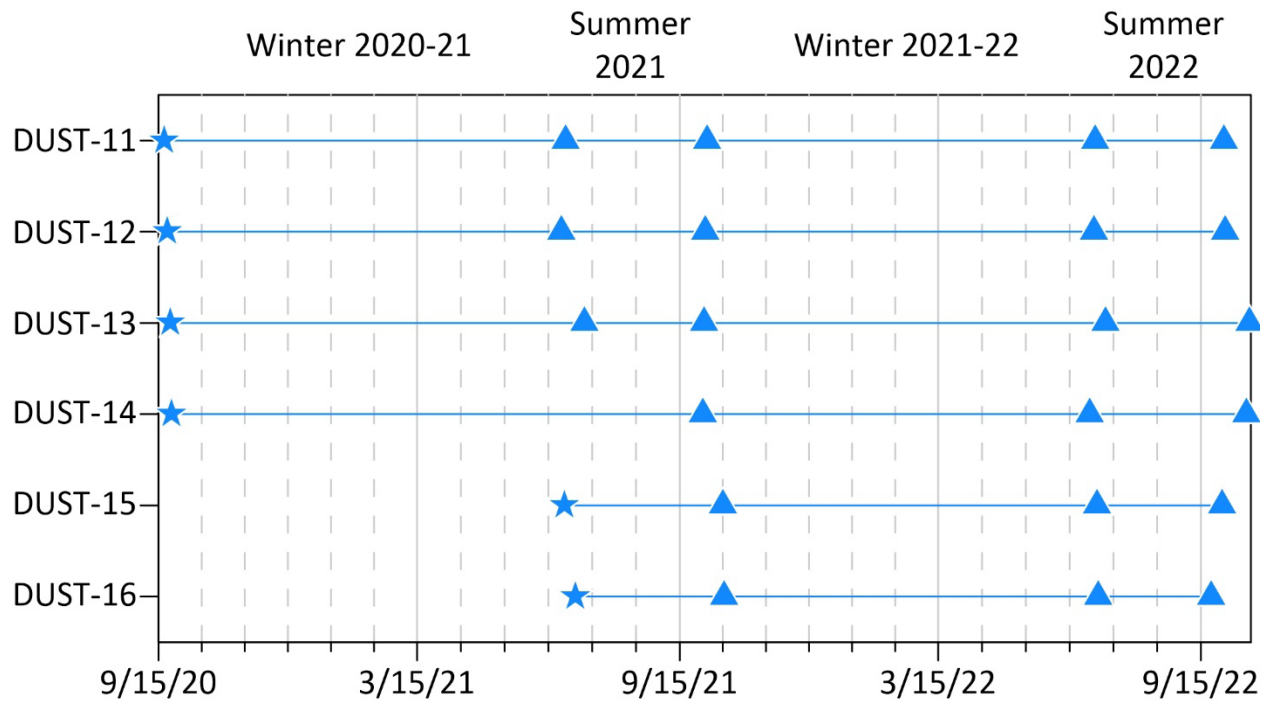

Figure S1. Deployments of the six passive dust collectors used in this study. Initial star in each timeline marks the original deployment of the collector. Subsequent solid triangles mark dates when the collector was emptied. Labels at the top identify the four dust collection intervals (Winter 2020-21, Summer 2021, Winter 2021-22, Summer 2022).
