# Supplementary material for: Mineral dust and pedogenesis in the alpine critical zone
Source: Copernicus journal article supplement (doi:10.5194/soil-10-167-2024), 2024-02-22
Supplement: Supplementary file 3 [file soil-10-167-2024-supplement.zip]

Archive with 6 entries (6 files):
- soil-10-167-2024-supplement-title-page.pdf
- Table S3. Rock Geochem.xlsx
- Table S1. Dust Geochem.xlsx
- Figure S1.pdf
- Figure S2.pdf
- Table S2. Soil Geochem.xlsx
