# Supplementary material for: Mineral dust and pedogenesis in the alpine critical zone
Source: Copernicus journal article supplement (doi:10.5194/soil-10-167-2024), 2024-02-22
Supplement: Supplementary file 3 [file soil-10-167-2024-supplement.zip › Figure S2.pdf]

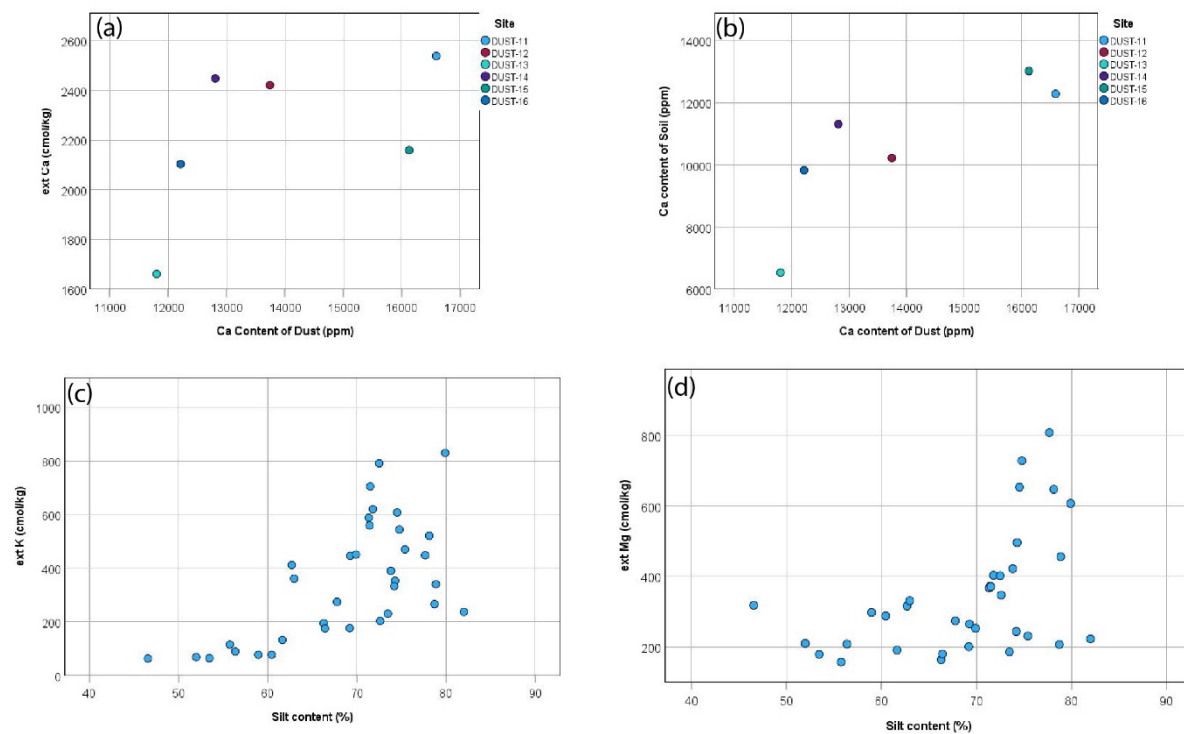

**Figure S2.** Example relationships between dust and soil properties mentioned in the text. (a) The mean value of extractable Ca in soil is higher at sites where the mean Ca content of the dust is greater. (b) The mean mineral Ca content of the soil is higher at sites where the Ca content of the dust is elevated. (c and d) Extractable K and Mg are higher in soil samples with greater silt content.
